# Supplementary material for: Tube–Iris Distance and Corneal Endothelial Cell Damage Following Ahmed Glaucoma Valve Implantation
Source: MDPI journal article supplement (doi:10.3390/jcm11175057), 2022-08-28
Supplement: s1 [file s1]

## Supplementary Materials

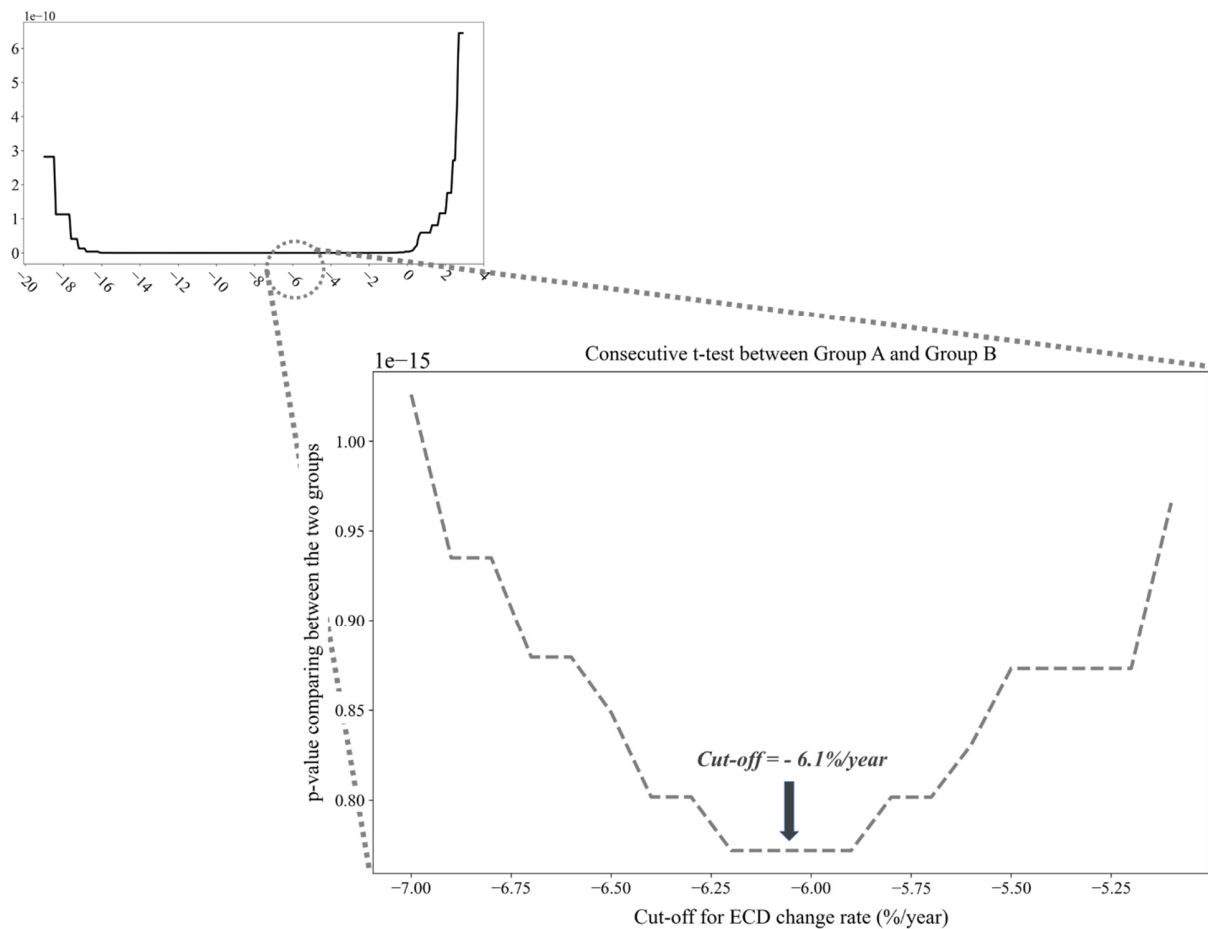

**Supplementary Figure S1.** Results of consecutive t-tests determining the optimal cut-off value for the endothelial cell density (ECD) change rate. ECD change rates were separated into two groups according to the evaluated cut-off values, and t-tests were conducted to compare the means of the ECD change rates between these groups. Using this methodology, we determined an optimal cut-off value of -6.1%/year, as this value had the smallest associated p-value.

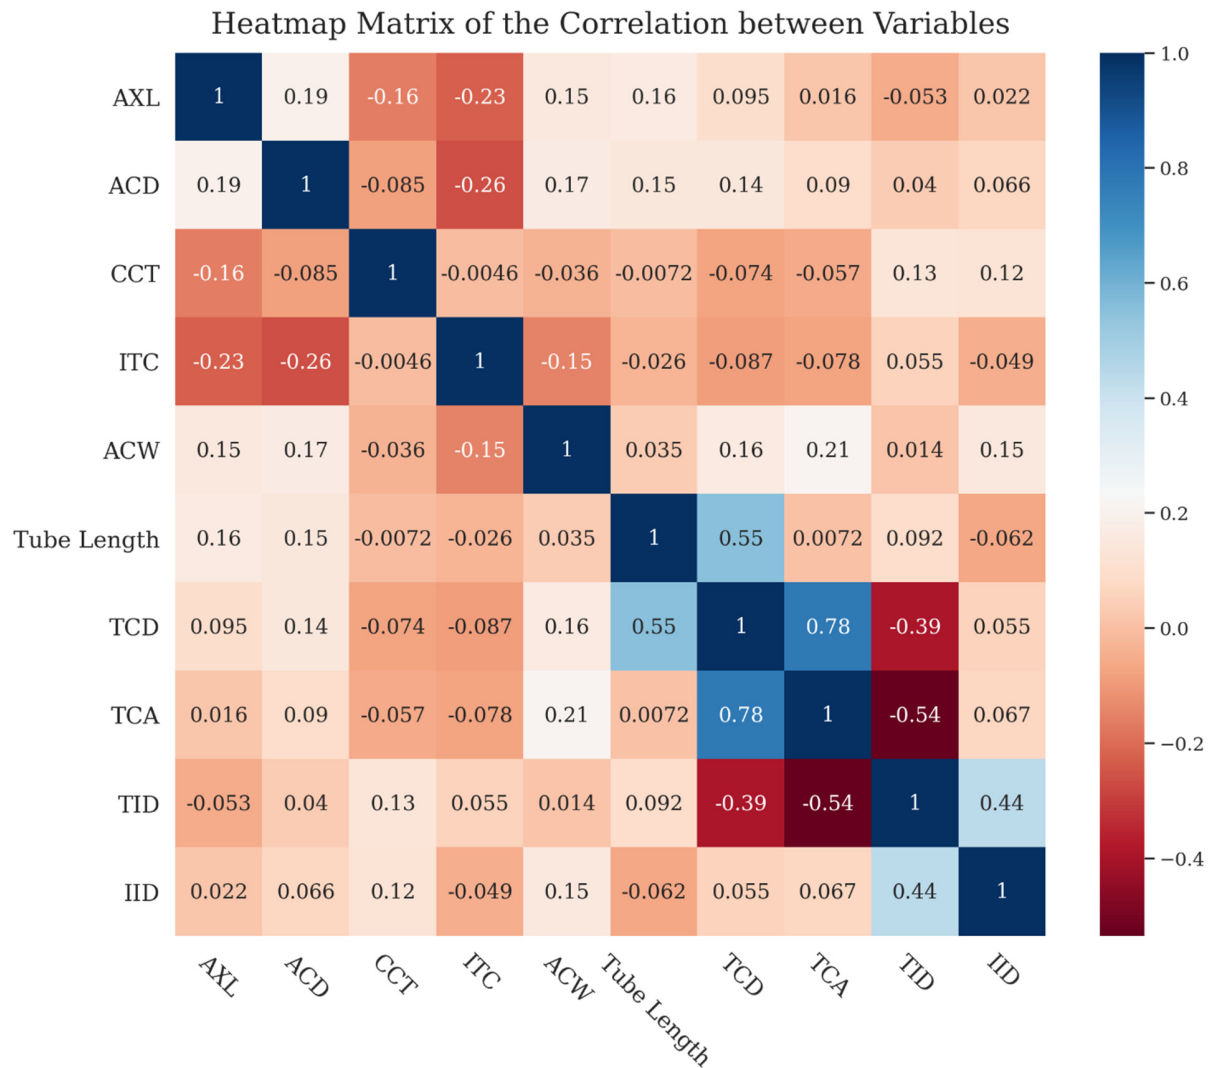

**Supplementary Figure S2.** Correlation heatmap matrix between a range of independent variables. Pearson's  $r$  was calculated between each pair of independent variables to verify collinearities.

Abbreviations: ACD, anterior chamber depth; ACW, anterior chamber width; AXL, axial length; CCT, central corneal thickness; IID, insertion-iris distance; ITC, iris trabecular meshwork contact; TCA, tube-corneal angle; TCD, tube-corneal distance; TID, tube-iris distance

**Supplementary Table S1.** Comparison of postoperative IOP and uveitis incidence between patients with short TID and long TID.

|                         | <b>TID &lt; 0.33 mm (n=66)</b>  | <b>TID ≥ 0.33 mm (n=37)</b>  | <b>p-value</b> |
|-------------------------|---------------------------------|------------------------------|----------------|
| <b>Final IOP (mmHg)</b> | 14.36 ± 4.01                    | 13.83 ± 5.34                 | 0.569*         |
| <b>Postop Uveitis</b>   | 1 (1.52)                        | 0 (0.00)                     | 1.000†         |
|                         | <b>TID &lt; 0.371 mm (n=70)</b> | <b>TID ≥ 0.371 mm (n=33)</b> | <b>p-value</b> |
| <b>Final IOP (mmHg)</b> | 14.33 ± 4.03                    | 13.84 ± 5.45                 | 0.612*         |
| <b>Postop Uveitis</b>   | 1 (1.43)                        | 0 (0.00)                     | 1.000†         |

\*t-test; †Fisher's exact test

IOP, intraocular pressure; TID, tube-iris distance.

**Supplementary Table S2.** Combinations of variables related to tube-corneal angle were used for additional univariable linear regression analyses.

|         | Univariable analysis |                    |         |
|---------|----------------------|--------------------|---------|
|         | Coefficient          | 95% CI             | p-value |
| TCD     | -0.0040              | [-0.0441, 0.0360]  | 0.842   |
| TCA     | 0.0011               | [-0.0005, 0.0027]  | 0.173   |
| TCD/TCA | 1.7264               | [-3.7824, 0.3297]  | 0.099   |
| TCA/IID | 0.0002               | [-0.0003, 0.0006]  | 0.393   |
| IID/TCA | -1.2467              | [-2.3017, -0.1918] | 0.021*  |
| TCA/AXL | 0.0259               | [-0.0129, 0.0646]  | 0.188   |
| AXL/TCA | -0.0284              | [-0.0706, 0.0138]  | 0.185   |
| TCA/ACW | 0.0126               | [-0.0064, 0.0317]  | 0.192   |
| ACW/TCA | -0.0572              | [-0.1491, 0.0346]  | 0.219   |

Only IID/TCA showed significance for predicting ECD change rate (%/year)

CI, confidence interval; TCD tube-corneal distance, TCA tube-corneal angle, IID insertion-iris distance, AXL axial length, ACW anterior chamber width, \*p<0.05
